# Supplementary material
Source: PubMed Central journal article supplement (PMC2815867)
Supplement: pp.109.148643_1.pdf [file pp.109.148643_1.pdf]

A

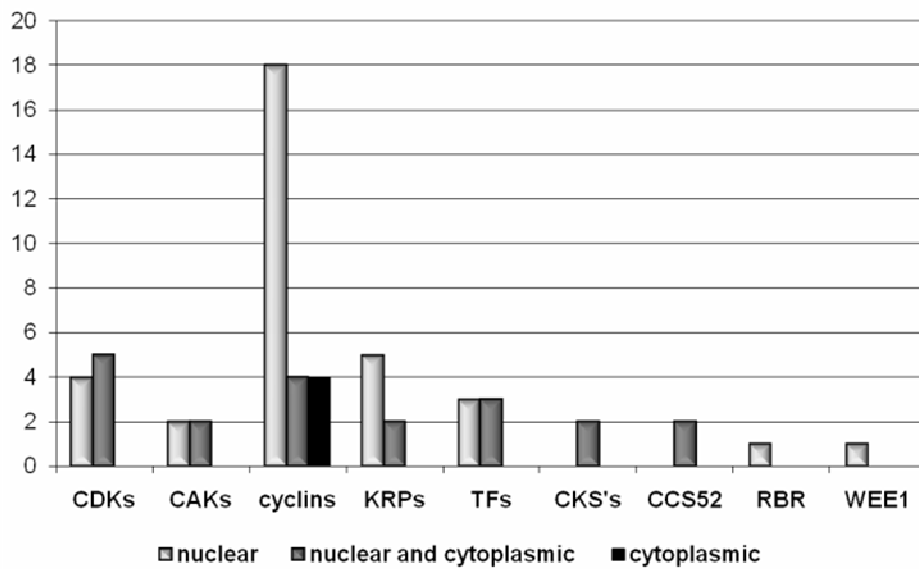

B

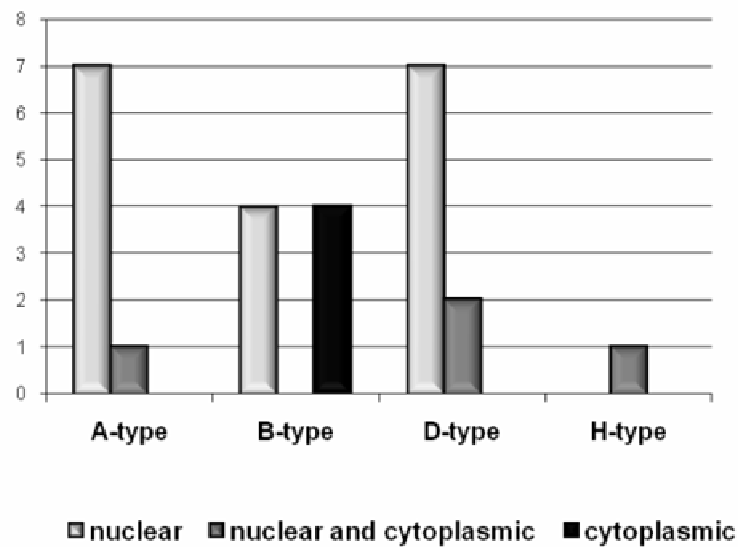

**Supplemental Figure 1.** Distribution of the localization patterns among the Arabidopsis core cell cycle proteins in interphase. (A) Chart representing localization patterns within each protein family and (B) within different cyclin groups.
