# Supplementary material
Source: PubMed Central journal article supplement (PMC2815867)
Supplement: pp.109.148643_2.pdf [file pp.109.148643_2.pdf]

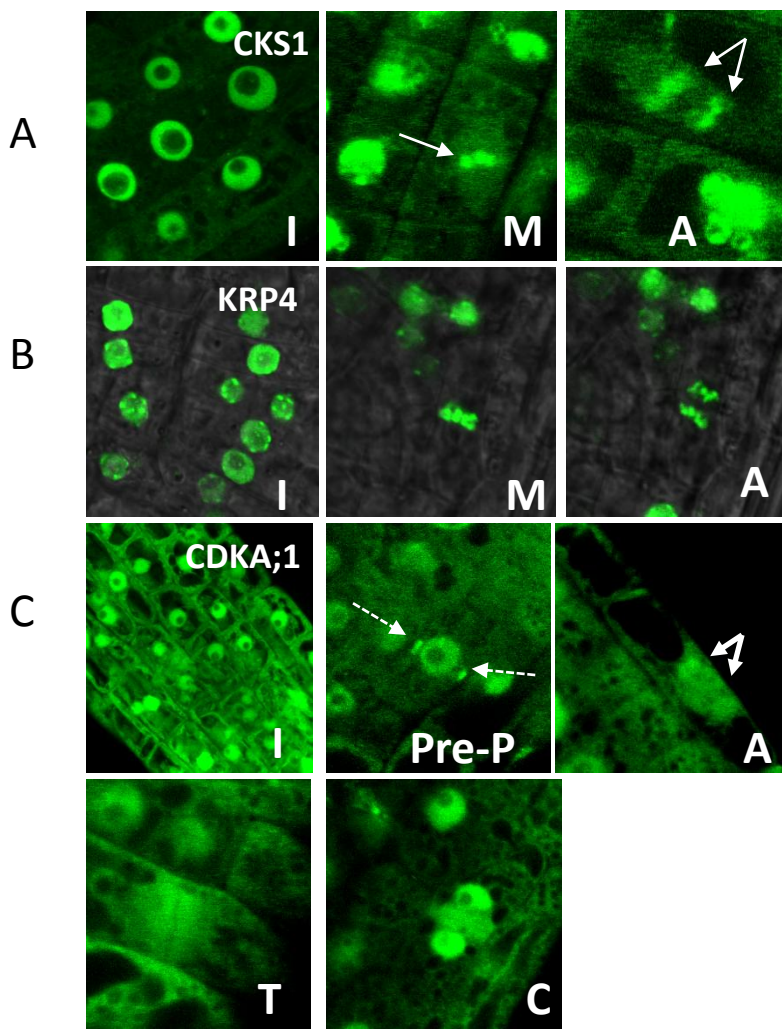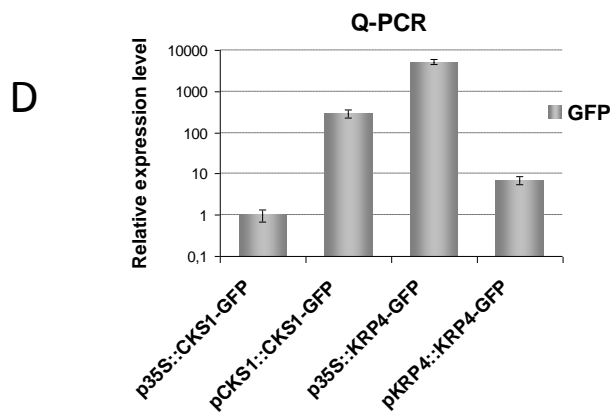

**Supplemental Figure 2.** Subcellular localization of fluorescent protein-tagged cell cycle proteins under the endogenous promoters. (A) pCKS1::CKS1-GFP (B) pKRP4::KRP4-GFP (C) pCDKA;1::CDKA;1-YFP in the *cdka;1* mutant background. Solid arrows indicate metaphase and anaphase chromosomes, dashed arrows indicate the PPB localization. Labels: I, interphase; Pre-P, pre-prophase, M, metaphase, A, anaphase, T, telophase, C, cytokinesis. (D) Comparison of expression levels of 35S- and endogenous transcripts of CKS1 and KRP4 in 7-day-old *Adabidopsis* plants by the qPCR analysis.
